# Supplementary material
Source: MDPI journal article supplement (https://www.mdpi.com/2673-9410/3/1/10)
Supplement: s1 [file s1]

# Lacustrine Cyanobacteria, Algal Blooms and Cyanotoxins in East Africa: Implications for Human and Ecological Health Protection

Timothy Omara <sup>1,2, \*</sup>, Christine Betty Nagawa <sup>3</sup>, Christine Kyarimpa <sup>4</sup>, Stefan Böhmendorfer <sup>2</sup>, Thomas Rosenau <sup>2</sup>, Solomon Omwoma Lugasi <sup>5</sup>, Henry Matovu <sup>6</sup>, Silver Odongo <sup>7</sup> and Patrick Ssebugere <sup>7,8,9\*</sup>

<sup>1</sup> Food Safety Laboratories, Chemistry Division, Testing Department, Standards Directorate, Uganda National Bureau of Standards, Bweyogerere Industrial and Business Park, Kampala P.O. Box 6329, Uganda

<sup>2</sup> Institute of Chemistry of Renewable Resources, Department of Chemistry, University of Natural Resources and Life Sciences Vienna (BOKU), Konrad-Lorenz-Straße 24, 3430 Tulln, Austria

<sup>3</sup> Department of Forestry, Biodiversity and Tourism, College of Agricultural and Environmental Sciences, Makerere University, Kampala P.O. Box 7062, Uganda

<sup>4</sup> Department of Chemistry, Faculty of Science, Kyambogo University, Kampala P.O. Box 1, Uganda

<sup>5</sup> Department of Physical Sciences, Jaramogi Oginga Odinga University of Science and Technology, Bondo P.O. Box 210-40601, Kenya

<sup>6</sup> Department of Chemistry, Gulu University, Gulu P.O. Box 166, Uganda; matovuh8@gmail.com

<sup>7</sup> Department of Chemistry, College of Natural Sciences, Makerere University, Kampala P.O. Box 7062, Uganda

<sup>8</sup> Department of Cell Toxicology, Helmholtz Centre for Environmental Research-UFZ, 04318 Leipzig, Germany

<sup>9</sup> Department of Analytical Environmental Chemistry, Helmholtz Centre for Environmental Research-UFZ, 04318 Leipzig, Germany

\* Correspondence: prof.timo2018@gmail.com (T.O.); patrick.ssebugere@mak.ac.ug (P.S.)

## SUPPLEMENTARY FILES





| Water resource (Country) | Trophic status | Chlorophyll <i>a</i> (µg L <sup>-1</sup> ) | Phytoplankton group <sup>1</sup>                     | Major genera or species                                        | MCs (µg MC-LR eq L <sup>-1</sup> ) | MCs congeners | Reference(s) |
|--------------------------|----------------|--------------------------------------------|------------------------------------------------------|----------------------------------------------------------------|------------------------------------|---------------|--------------|
| 6. Rwanda                |                |                                            |                                                      |                                                                |                                    |               |              |
| Lake Muzahi              | ET             | 18.1                                       | CYB (47-58%), Chlorococcales (27-32%), diatoms (15%) | <i>Microcystis aeruginosa</i> and <i>Ceratium hirundinella</i> | UDT                                | UDT           | [60]         |

**Note:** Trophic status: MT/ET = mesotrophic/eutrophic; ET = eutrophic, OT = oligotrophic, and HT = hypereutrophic. The classifications were that chlorophyll-*a* concentration up to 6 µg/L = OT; upto about 20 µg/L = MT/ET, and then ET/HT at about 60 µg L<sup>-1</sup>. <sup>1</sup>Expressed as percentage of the total phytoplankton in the samples. Where *Spirulina platensis* was indicated, its synonym (*Arthrospira fusiformis*) is indicated here. CYB: Cyanobacteria; BDL: Undetected; UDT: Undetermined, *m/z* = mass to charge ratio. Nyanza Gulf and Kisumu Bay are in Kenya, Murchison Bay and Napoleon Gulf are in Uganda while Shirati Bay and Mwanza Gulf are in Tanzania. Nnakabirwa et al. [26] found the dominant cyanobacteria to be *Planktolyngbya limnetica* in the crater lakes.

## References

1. Cocquyt, C.; Plisnier, P.-D.; Mulimbwa, N.; Nshombo, M. Unusual massive phytoplankton bloom in the oligotrophic Lake Tanganyika. *Plant Ecol. Evol.* **2021**, *154*, 351–361.
2. Ehrenfels, B.; Bartosiewicz, M.; Mbonde, A.; Baumann, K.; Dinkel, C.; Junker, J.; Kamulali, T.M.; Kimirei, I. A.; Niederdorfer, R.; Odermatt, D. Pomati, F.; Sweke, E.A.; Wehrli, B. Diazotrophic Cyanobacteria are Associated With a Low Nitrate Resupply to Surface Waters in Lake Tanganyika. *Front. Environ. Sci.* **2021**, *9*, 716765.
3. Darchambeau, F.; Sarmiento, H.; Descy, J.P. Primary production in a tropical large lake: the role of phytoplankton composition. *Sci. Total Environ.* **2014**, *473–474*, 178–188.
4. Hamisi, M.; Lugomela, C.; Lyimo, T.; Bergman, B.; Díez, B. Plankton composition, biomass, phylogeny and toxin genes in Lake Big Momela, Tanzania. *Afr. J. Aquat. Sci.* **2017**, *42*, 109–121.
5. Lugomela, C.; Pratap, H.B.; Mgaya, Y.D. Cyanobacteria Blooms: A Possible Cause of Mass Mortality of Lesser Flamingos in Lake Manyara and Lake Big Momela, Tanzania. *Harmful Algae* **2006**, *5*, 534–541.
6. Melack, J.M.; Kilham, P. Photosynthetic rates of phytoplankton in East African alkaline, saline lakes. *Limnol. Oceanogr.* **1974**, *19*, 743–755.
7. Nonga, H.E.; Mdegela, R. H.; Sandvik, M.; Lie, E.; Miles, C. O.; Skaare, J. U. Cyanobacteria and cyanobacterial toxins in the alkaline-saline Lakes Natron and Momela, Tanzania. *Tanzania Veterinary Association Proceedings* **2017**, *32*, 108–116.
8. Ballot, A.; Krienitz, L.; Kotut, K.; Wiegand, C.; Metcalf, J. S.; Codd, G. A.; Pflugmacher, S. Cyanobacteria and cyanobacterial toxins in three alkaline Rift Valley lakes of Kenya—Lakes Bogoria, Nakuru and Elmenteita. *J. Plankton Res.* **2004**, *26*, 925–935.
9. Dadheech, P.K.; Glöckner, G.; Casper, P.; Kotut, K.; Mazzoni, C. J.; Mbedi, S.; Krienitz, L. Cyanobacterial diversity in the hot spring, pelagic and benthic habitats of a tropical soda lake. *FEMS Microbiol. Ecol.* **2013**, *85*, 389–401.
10. Kibichii, S.; Shivoga, W. A.; Muchiri, M.; Enanga, E.; Miller, S. N. Seasonality in water quality and its influence on the abundance and distribution of phytoplankton and chironomid larvae in Lake Nakuru, Kenya. *Internationale Vereinigung für theoretische und angewandte Limnologie: Verhandlungen* **2008**, *30*, 333–338.
11. Krienitz, L.; Kotut, K. Fluctuating algal food populations and the occurrence of lesser flamingos (*Phoeniconaias minor*) in three Kenyan rift valley lakes. *J. Phycol.* **2010**, *46*, 1088–1096.
12. Kotut, K.; Ballot, A.; Krienitz, L. Toxic cyanobacteria and their toxins in standing waters of Kenya: implications for water resource use. *J. Water Health* **2006**, *4*, 3–18.
13. Ballot, A.; Krienitz, L.; Kotut, K.; Wiegand, C.; Pflugmacher, S. Cyanobacteria and cyanobacterial toxins in the crater lakes Sonachi and Simbi, Kenya. *Harmful Algae* **2005**, *4*, 139–150.
14. Melack, J.M.; Kilham, P.; Fisher, T.R. Responses of phytoplankton to experimental fertilization with ammonium and phosphate in an African soda lake. *Oecologia* **1982**, *52*, 321–326.
15. Melack, J.M. Photosynthesis and growth of *Spirulina platensis* (Cyanophyta) in an equatorial lake (Lake Simbi, Kenya). *Limnol. Oceanogr.* **1979**, *24*, 753–760.
16. Njuguna, S. Nutrient-phytoplankton relationships in a tropical meromictic soda lake. *Hydrobiologia* **1988**, *158*, 15–28.
17. Beadle, L.C. Scientific results of the Cambridge Expedition to the East African lakes, 1930–31. 4. The waters of some East African Lakes in relation to their fauna and flora. *J. Linn. Soc. Zool.* **1932**, *38*, 157–211.
18. Vareschi, E. The ecology of Lake Nakuru (Kenya). *Oecologia* **1978**, *32*, 11–35.
19. Olilo, C.O.; Shivoga, W. A.; Kitetu, J. J.; Agembe, S. Effects of environmental factors on cyanobacteria dynamics in Lake Baringo, Kenya. *Lakes Reserv.* **2014**, *19*, 240–254.
20. Raffoul, M.H.; Enanga, E. M.; Senar, O. E.; Creed, I. F.; Trick, C. G. Assessing the potential health risk of cyanobacteria and cyanotoxins in Lake Naivasha, Kenya. *Hydrobiologia* **2020**, *847*, 1041–1056.

21. Nyachiro, D.N.; Ongarora, B. G.; Kibet, J. K.; Rono, N. K. Characterization of cyanobacterial toxins in Lake Naivasha, Kenya. *Asian J. Res. Chem.* **2016**, *9*, 217-220.
22. Krienitz, L.; Dadheech, P. K.; Fastner, J.; Kotut, K. The rise of potentially toxin producing cyanobacteria in Lake Naivasha, Great African Rift Valley, Kenya. *Harmful Algae* **2013**, *27*, 42–51.
23. Muruga, B.N.; Wagacha, J. M.; Kabaru, J. M.; Amugune, N.; Duboise, S. M. Effect of physicochemical conditions on growth rates of cyanobacteria species isolated from Lake Magadi, a soda lake in Kenya. *WebPub J. Sci. Res.* **2014**, *2*, 41-50.
24. Busobozi, E. Eutrophication in Ugandan Crater Lakes. A Case Study of Six Crater Lakes Located in Kabarole District Western Uganda. *MSc Thesis, University of Canterbury Christchurch, New Zealand.* **2017**.
25. Nyakoojo, C.; Byarujali, S.M. An ecological study of two shallow, equatorial lakes: Lake Mburo and Lake Kachera, Uganda. *Afr. J. Ecol.* **2010**, *48*, 860–864.
26. Nankabirwa, A.; De Crop, W.; Van der Meeren, T.; Cocquyt, C.; Plisnier, P.-D.; Balirwa, J.; Verschuren, D. Phytoplankton communities in the crater lakes of western Uganda, and their indicator species in relation to lake trophic status. *Ecol. Indic.* **2019**, *107*, 105563.
27. Kamanyi, J.R., Ogwang, O.; Twongo, E. Plankton identified in stomach contents of *Oreochromis niloticus* (Pisces, Cichlidae) and the water system of Lakes Edward, George, and Kazinga channel - Uganda. *Afr. J. Trop. Hydrobiol. Fish.* **1996**, *7*, 49-54.
28. Stoyneva-Gärtner, M.P.; Morana, C.; Borges, A. V.; Okello, W.; Bouillon, S.; Deirmendjian, L.; Lambert, T.; Roland, F.; Nankabirwa, A.; Nabafu, E.; Descy, J.-P. Diversity and ecology of phytoplankton in Lake Edward (East Africa): Present status and long-term changes. *J. Great Lakes Res.* **2020**, *46*, 741-751.
29. Poste, A.E. Microcystin in Ugandan lakes: Production dynamics, accumulation in fish, and risk evaluation. *PhD Thesis, University of Waterloo, Waterloo, Canada.* **2010**.
30. Ganf, G.G. Phytoplankton Biomass and Distribution in a Shallow Eutrophic Lake (Lake George, Uganda). *Oecologia* **1974**, *16*, 9-29
31. Okello, W.; Ostermaier, V.; Portmann, C.; Gademann, K.; Kurmayer, R. Spatial isolation favours the divergence in microcystin net production by *Microcystis* in Ugandan freshwater lakes. *Water Res.* **2010**, *44*, 2803–2814.
32. Cocquyt, C.; Plisnier, P.-D.; Gelorini, V.; Rumes, B.; Verschuren, D. Observations on the limnology and phytoplankton community of crater Lake Kyaninga (Uganda), with special attention to its diatom flora. *Plant Ecol. Evol.* **2010**, *143*, 365–377.
33. Nkambo, M.; Bugenyi, M.; Naluwayiro, J.; Nayiga, S.; Kiggundu, V.; Magezi, G.; Leonard, W. Planktonic and Fisheries biodiversity of Alkaline Saline crater lakes of Western Uganda. *Biodiv. J.* **2015**, *6*, 95–104.
34. Wandera, S.B. Report on the current state of the fishery of the Ugandan sector of Lake Albert. *Fisheries Resources Research Institute.* **2000**.
35. Kondowe, B.; Masese, F.O.; Raburu, P.; Singini, W.; Sitati, A.; Walumona, R. Seasonality in Environmental Conditions Drive Variation in Plankton Communities in a Shallow Tropical Lake. *Front. Water* **2022**, *4*, 883767.
36. Githukia, C.; Onyango, D.; Luswet, D.; Ramkat, R.; Kowenje, C.; Miruka, J.; Lung'ayia, H.; Orina, P. An Analysis of Knowledge, Attitudes and Practices of Communities in Lake Victoria, Kenya on Microcystin Toxicity. *Open J. Ecol.* **2022**, *12*, 198-210.
37. Mchau, G.; Machunda, R.; Kimanya, M.; Makule, E.; Gong, Y.; Mpolya, E.; Meneely, J. P.; Elliott, C.T.; Greer, B. First Report of the Co-occurrence of *Cylindrospermopsis*, *Nodularin* and *Microcystins* in the Freshwaters of Lake Victoria, Tanzania. *Expo. Health* **2021**, *13*, 185-194.
38. Miruka, J.; Getabu, A.; Sitoki, L.; Onchieku, J.; Mwamburi, J.; Ogendi, G.; Chrisphine, N.; Odoli, C. Water quality, phytoplankton composition and microcystin concentrations in Kisumu Bay (Kenya) of Lake Victoria after a prolonged water hyacinth infestation period. *Lakes Reserv.* **2021**, *26*, e12380.
39. Simiyu, B.; Oduor, S.O.; Rohrlack, T.; Sitoki, L.; Kurmayer, R. Microcystin content in phytoplankton and in small fish from Eutrophic Nyanza Gulf, L. Victoria, Kenya. *Toxins* **2018**, *10*, 275.

40. Mgaya, Y.; Limbu, S.M.; Lugomela, C.V.; Kimirei, I.A.; Kayanda, R.J.; Ngupula, G. W. Biodiversity Indicators: Plankton and Macroinvertebrates in Lake Victoria, Selected Satellite Lakes and Rivers. In: Mgaya, Y.; Mahongo, S. (eds). Lake Victoria Fisheries Resources. *Monographiae Biologicae*, vol 93. Springer, Cham. **2017**. pp. 81-106.
41. Waya, R.; Limbu, S.M.; Ngupula, G.W.; Mwita, C.J.; Mgaya, Y.D. Temporal patterns in phytoplankton, zooplankton and fish composition, abundance and biomass in Shirati Bay, Lake Victoria, Tanzania. *Lakes Reserv.* **2017**, *22*, 19-42.
42. Mbonde, A.S.; Sitoki, L.; Kurmayer, R. Phytoplankton Composition and Microcystin Concentrations in Open and Closed Bays of Lake Victoria, Tanzania. *Aquat. Ecosyst. Health Manage.* **2015**, *18*, 212-220.
43. Gikuma-Njuru, P.; Hecky, R. E.; Guildford, S. J.; MacIntyre, S. Spatial variability of nutrient concentrations, fluxes, and ecosystem metabolism in Nyanza Gulf and Rusinga Channel, L. Victoria (East Africa). *Limnol. Oceanogr.* **2013**, *58*, 774–789.
44. Sekadende, B.C.; Lyimo, T.J.; Kurmayer, R. Microcystin production by cyanobacteria in the Mwanza Gulf (Lake Victoria, Tanzania). *Hydrobiologia* **2005**, *543*, 299–304.
45. Miles, C.O.; Sandvik, M.; Nonga, H. E.; Rundberget, T.; Wilkins, A.L.; Rise, F.; Ballot, A. Identification of microcystins in a Lake Victoria cyanobacterial bloom using LC-MS with thiol derivatization. *Toxicon* **2013**, *70*, 21–31.
46. Olokotum, M.; Troussellier, M.; Escalas, A.; Hamlaoui, S.; Okello, W.; Semyalo, R.; Humbert, J.-F.; Bernard, C. High nutrient loading and climatic parameters influence the dominance and dissimilarity of toxigenic cyanobacteria in northern bays of Lake Victoria. *J. Great Lakes Res.* **2021**, *47*, 985–996.
47. Olokotum, M.; Humbert, J.-F.; Quiblier, C.; Okello, W.; Semyalo, R.; Troussellier, M.; Marie, B.; Baumann, K.; Kurmayer, R.; Bernard, C. Characterization of Potential Threats from Cyanobacterial Toxins in Lake Victoria Embayments and during Water Treatment. *Toxins* **2022**, *14*, 664.
48. Poste, A.E.; Hecky, R.E.; Guildford, S.J. Phosphorus enrichment and carbon depletion contribute to high Microcystis biomass and microcystin concentrations in Ugandan lakes. *Limnol. Oceanogr.* **2013**, *58*, 1075–1088.
49. Sitoki, L.; Kurmayer, R.; Rott, E. Spatial variation of phytoplankton composition, biovolume, and resulting microcystin concentrations in the Nyanza Gulf (L. Victoria, Kenya). *Hydrobiologia* **2012**, *691*, 109–122.
50. Poste, A.E.; Hecky, R.E.; Guildford, S.J. Evaluating microcystin exposure risk through fish consumption. *Environ. Sci. Technol.* **2011**, *45*, 5806–5811.
51. Okello, W.; Kurmayer, R. Seasonal development of cyanobacteria and microcystin production in Ugandan freshwater lakes. *Lakes Reserv. Res. Manag.* **2011**, *16*, 123–135.
52. Haande, S.; Rohrlack, T.; Semyalo, R.P.; Brettum, P.; Edvardsen, B.; Lyche-Solheim, A.; Sorensen, K.; Larsson, P. Phytoplankton dynamics and cyanobacterial dominance in Murchison Bay of Lake Victoria (Uganda) in relation to environmental conditions. *Limnol. Ecol. Manag. Inland Waters* 2011. *41*(1): p. 20–29.
53. Semyalo, R.; Rohrlack, T.; Kayiira, D.; Kizito, Y.S.; Byarujali, S.; Nyakairu, G.; Larsson, P. On the diet of Nile tilapia in two eutrophic tropical lakes containing toxin producing cyanobacteria. *Limnologia* **2011**, *41*, 30–36.
54. Krienitz, L.; Ballot, A.; Wiegand, C.; Kotut, K.; Codd, G.A.; Pflugmacher, S. Cyanotoxin-producing bloom of *Anabaena flos-aquae*, *Anabaena discoidea* and *Microcystis aeruginosa* (Cyanobacteria) in Nyanza Gulf of Lake Victoria, Kenya. *J. Appl. Bot.* **2002**, *76*, 79–183.
55. Mugidde, R.; Hecky, R.E.; Hendzel, L.L.; Taylor, W.D. Pelagic nitrogen fixation in Lake Victoria (East Africa). *J. Great Lakes Res.* **2003**, *29*, 76–88.
56. Ngupula, G.; Mbonde, A.; Ezekiel, C. Spatial and temporal patterns of phytoplankton abundance and composition in three ecological zones in the Tanzanian waters of Lake Victoria. *Afr. J. Aquat. Sci.* **2011**, *36*, 197–206.
57. Lung'aya, H.B.O.; M'harzi, A.; Tackx, M.; Gichuki, J.; Symoens, J.J. Phytoplankton community structure and environment in the Kenyan waters of Lake Victoria. *Freshw. Biol.* **2000**, *43*, 529–543.
58. Ochumba, P.B.O.; Kibbara, D.I. Observations on blue-green algal blooms in the open waters of Lake Victoria, Kenya. *Afr. J. Ecol.* **1989**, *27*, 23–34.

59. Gikuma-Njuru, P.; Hecky, R.E. Nutrient concentrations in Nyanza Gulf, Lake Victoria, Kenya: light limits algal demand and abundance. *Hydrobiologia* **2005**, *534*, 131–140.
60. Mukankomeje, R.; Plisnier, P.-D.; Descy, J.-P.; Massaut, L. Lake Muzahi, Rwanda: limnological features and phytoplankton production. *Hydrobiologia* **1993**, *257*, 107–120.
